# Supplementary material for: Comparison of two molecular barcodes for the study of equine strongylid communities with amplicon sequencing
Source: PeerJ journal article supplement (doi:10.7717/peerj.15124), 2023-04-12

A

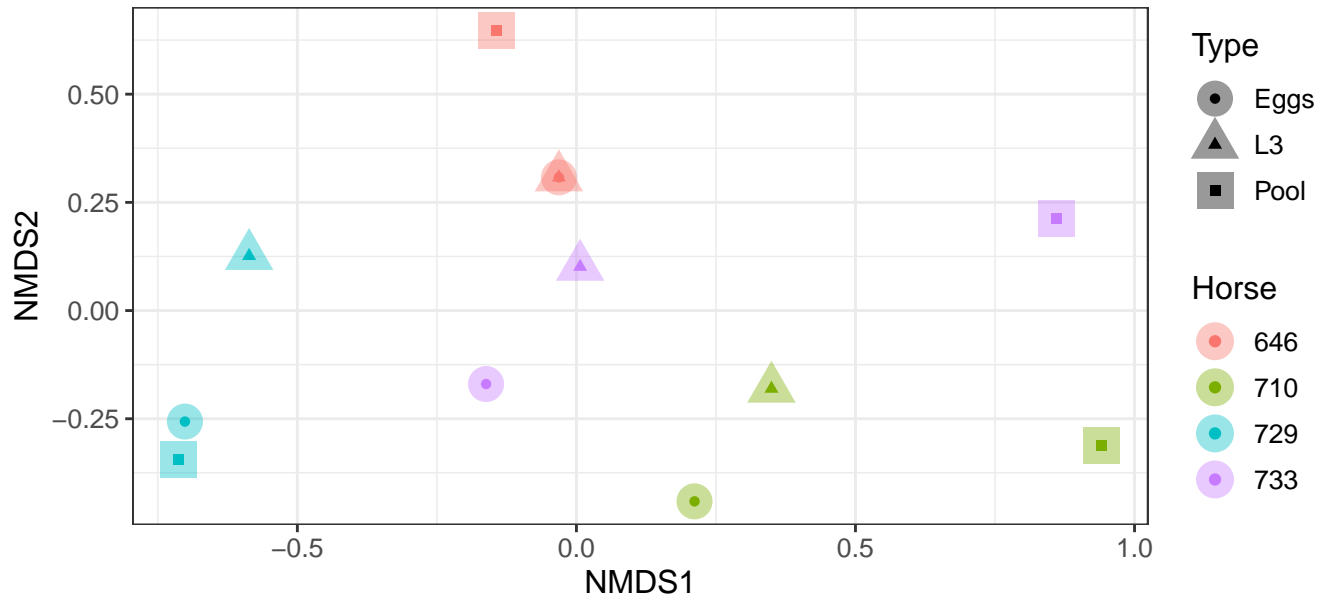

B

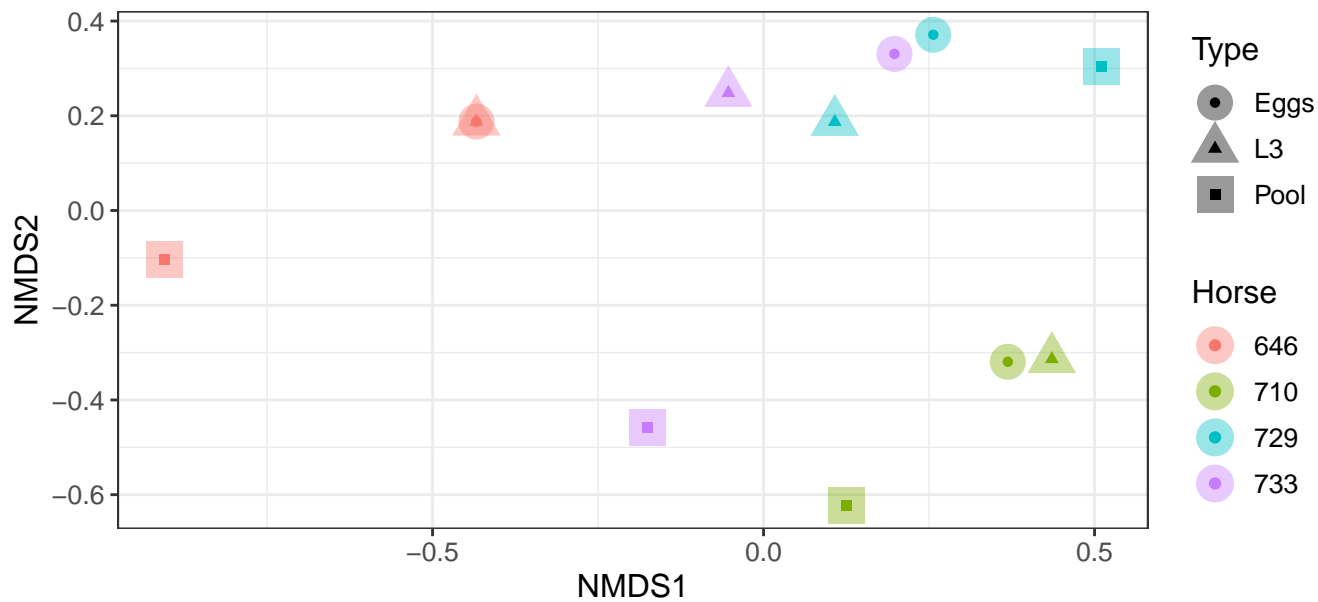

Supplement: FigureS1rev.pdf [file FigureS1rev.pdf]
