# Supplementary material for: Comparison of two molecular barcodes for the study of equine strongylid communities with amplicon sequencing
Source: PeerJ. 2023 Apr 12;11:e15124. doi: 10.7717/peerj.15124 (PMC10105562; doi:10.7717/peerj.15124)
Supplement: Supplemental Information 4 [file peerj-11-15124-s004.xlsx]

## Sheet: metadata_raw_reads_full_cyathom
LibraryName	FileName	Fastq1	Fastq2	Sample description	Sample name	SRA
COICP-12	COICP-12_AGATAG-JG62T_L001	COICP-12_AGATAG-JG62T_L001_R1.fastq.gz	COICP-12_AGATAG-JG62T_L001_R2.fastq.gz	COI metabarcoding of Cyathostomin: mock community, 2 species, homogeneous, low concentration	COICP-12	SRR19660663	1
COIEggs-646	COIEggs-646_GGTATA-JRDRM_L001	COIEggs-646_GGTATA-JRDRM_L001_R1.fastq.gz	COIEggs-646_GGTATA-JRDRM_L001_R2.fastq.gz	COI metabarcoding of Cyathostomin: Eggs, Horse 646	COIEggs-646	SRR19660662	1
COIEggs-710	COIEggs-710_CAATTA-JRDRM_L001	COIEggs-710_CAATTA-JRDRM_L001_R1.fastq.gz	COIEggs-710_CAATTA-JRDRM_L001_R2.fastq.gz	COI metabarcoding of Cyathostomin: Eggs, Horse 710	COIEggs-710	SRR19660581	1
COIEggs-717	COIEggs-717_GATAGA-JRDRM_L001	COIEggs-717_GATAGA-JRDRM_L001_R1.fastq.gz	COIEggs-717_GATAGA-JRDRM_L001_R2.fastq.gz	COI metabarcoding of Cyathostomin: Eggs, Horse 717	COIEggs-717	SRR19660534	1
COIEggs-720	COIEggs-720_GATCTG-JRDRM_L001	COIEggs-720_GATCTG-JRDRM_L001_R1.fastq.gz	COIEggs-720_GATCTG-JRDRM_L001_R2.fastq.gz	COI metabarcoding of Cyathostomin: Eggs, Horse 720	COIEggs-720	SRR19660523	1
COIEggs-726	COIEggs-726_TGGTCA-JRDRM_L001	COIEggs-726_TGGTCA-JRDRM_L001_R1.fastq.gz	COIEggs-726_TGGTCA-JRDRM_L001_R2.fastq.gz	COI metabarcoding of Cyathostomin: Eggs, Horse 726	COIEggs-726	SRR19660478	1
COIEggs-729	COIEggs-729_GAACAC-JRDRM_L001	COIEggs-729_GAACAC-JRDRM_L001_R1.fastq.gz	COIEggs-729_GAACAC-JRDRM_L001_R2.fastq.gz	COI metabarcoding of Cyathostomin: Eggs, Horse 729	COIEggs-729	SRR19660621	1
COIEggs-733	COIEggs-733_AATTCT-JRDRM_L001	COIEggs-733_AATTCT-JRDRM_L001_R1.fastq.gz	COIEggs-733_AATTCT-JRDRM_L001_R2.fastq.gz	COI metabarcoding of Cyathostomin: Eggs, Horse 733	COIEggs-733	SRR19660610	1
COIEggs-734	COIEggs-734_CACTGT-JRDRM_L001	COIEggs-734_CACTGT-JRDRM_L001_R1.fastq.gz	COIEggs-734_CACTGT-JRDRM_L001_R2.fastq.gz	COI metabarcoding of Cyathostomin: Eggs, Horse 734	COIEggs-734	SRR19660563	1
COIEggs-748	COIEggs-748_AAGGTG-JRDRM_L001	COIEggs-748_AAGGTG-JRDRM_L001_R1.fastq.gz	COIEggs-748_AAGGTG-JRDRM_L001_R2.fastq.gz	COI metabarcoding of Cyathostomin: Eggs, Horse 748	COIEggs-748	SRR19660516	1
COIEggs-755	COIEggs-755_GACTCG-JRDRM_L001	COIEggs-755_GACTCG-JRDRM_L001_R1.fastq.gz	COIEggs-755_GACTCG-JRDRM_L001_R2.fastq.gz	COI metabarcoding of Cyathostomin: Eggs, Horse 755	COIEggs-755	SRR19660661	1
COIH2O-1	COIH2O-1_GCCGCG-JRDRM_L001	COIH2O-1_GCCGCG-JRDRM_L001_R1.fastq.gz	COIH2O-1_GCCGCG-JRDRM_L001_R2.fastq.gz	COI metabarcoding of Cyathostomin: H2O, Negative control	COIH2O-1	SRR19660650	1
COIL3-646	COIL3-646_GTGCCA-JRDRM_L001	COIL3-646_GTGCCA-JRDRM_L001_R1.fastq.gz	COIL3-646_GTGCCA-JRDRM_L001_R2.fastq.gz	COI metabarcoding of Cyathostomin: L3, Horse 646	COIL3-646	SRR19660572	1
COIL3-710	COIL3-710_TTCAAC-JRDRM_L001	COIL3-710_TTCAAC-JRDRM_L001_R1.fastq.gz	COIL3-710_TTCAAC-JRDRM_L001_R2.fastq.gz	COI metabarcoding of Cyathostomin: L3, Horse 710	COIL3-710	SRR19660571	1
COIL3-717	COIL3-717_AATGGT-JRDRM_L001	COIL3-717_AATGGT-JRDRM_L001_R1.fastq.gz	COIL3-717_AATGGT-JRDRM_L001_R2.fastq.gz	COI metabarcoding of Cyathostomin: L3, Horse 717	COIL3-717	SRR19660570	1
COIM1-1	COIM1-1_AGCCCT-JRDRM_L001	COIM1-1_AGCCCT-JRDRM_L001_R1.fastq.gz	COIM1-1_AGCCCT-JRDRM_L001_R2.fastq.gz	COI metabarcoding of Cyathostomin: mock, COI_Homogeneous_5species_1	COIM1-1	SRR19660569	1
COIM1	COIM1_TGGCCG-JRDRM_L001	COIM1_TGGCCG-JRDRM_L001_R1.fastq.gz	COIM1_TGGCCG-JRDRM_L001_R2.fastq.gz	COI metabarcoding of Cyathostomin: mock, COI_Homogeneous_5species	COIM1	SRR19660568	1
COIM2-1	COIM2-1_CCAGCC-JRDRM_L001	COIM2-1_CCAGCC-JRDRM_L001_R1.fastq.gz	COIM2-1_CCAGCC-JRDRM_L001_R2.fastq.gz	COI metabarcoding of Cyathostomin: mock, COI_mock_Homogeneous_5species_1	COIM2-1	SRR19660567	1
COIM2	COIM2_CATGAG-JRDRM_L001	COIM2_CATGAG-JRDRM_L001_R1.fastq.gz	COIM2_CATGAG-JRDRM_L001_R2.fastq.gz	COI metabarcoding of Cyathostomin: mock, COI_mock_Homogeneous_5species	COIM2	SRR19660566	1
COIM3	COIM3_CCCTCC-JRDRM_L001	COIM3_CCCTCC-JRDRM_L001_R1.fastq.gz	COIM3_CCCTCC-JRDRM_L001_R2.fastq.gz	COI metabarcoding of Cyathostomin: mock, COI_Homogeneous_2species_1to4ratio	COIM3	SRR19660565	1
COIM4	COIM4_TGTTCG-JRDRM_L001	COIM4_TGTTCG-JRDRM_L001_R1.fastq.gz	COIM4_TGTTCG-JRDRM_L001_R2.fastq.gz	COI metabarcoding of Cyathostomin: mock, COI_Homogeneous_2species	COIM4	SRR19660564	1
COIM5	COIM5_CTAGTC-JRDRM_L001	COIM5_CTAGTC-JRDRM_L001_R1.fastq.gz	COIM5_CTAGTC-JRDRM_L001_R2.fastq.gz	COI metabarcoding of Cyathostomin: mock, COI_Homogeneous_2species_3to4ratio	COIM5	SRR19660562	1
COIMeq-C12	COIMeq-C12_TTGTGA-JG62T_L001	COIMeq-C12_TTGTGA-JG62T_L001_R1.fastq.gz	COIMeq-C12_TTGTGA-JG62T_L001_R2.fastq.gz	COI metabarcoding of Cyathostomin: mock, COI_mock_Homogeneous_11species_1	COIMeq-C12	SRR19660561	1
COIMeq	COIMeq_AAGTGG-JRDRM_L001	COIMeq_AAGTGG-JRDRM_L001_R1.fastq.gz	COIMeq_AAGTGG-JRDRM_L001_R2.fastq.gz	COI metabarcoding of Cyathostomin: mock, COI_mock_Homogeneous_11species	COIMeq	SRR19660560	1
COIMS10-C12	COIMS10-C12_CCCCAT-JG62T_L001	COIMS10-C12_CCCCAT-JG62T_L001_R1.fastq.gz	COIMS10-C12_CCCCAT-JG62T_L001_R2.fastq.gz	COI metabarcoding of Cyathostomin: mock, COI_mock_Heterogeneous_11species_1	COIMS10-C12	SRR19660559	1
COIMS10	COIMS10_GCCACA-JRDRM_L001	COIMS10_GCCACA-JRDRM_L001_R1.fastq.gz	COIMS10_GCCACA-JRDRM_L001_R2.fastq.gz	COI metabarcoding of Cyathostomin: mock, COI_mock_Heterogeneous_11species	COIMS10	SRR19660558	1
COIPool-646	COIPool-646_AGTATT-JRDRM_L001	COIPool-646_AGTATT-JRDRM_L001_R1.fastq.gz	COIPool-646_AGTATT-JRDRM_L001_R2.fastq.gz	COI metabarcoding of Cyathostomin: Adult, Horse 646	COIPool-646	SRR19660557	1
COIPool-710	COIPool-710_GTTAGT-JRDRM_L001	COIPool-710_GTTAGT-JRDRM_L001_R1.fastq.gz	COIPool-710_GTTAGT-JRDRM_L001_R2.fastq.gz	COI metabarcoding of Cyathostomin: Adult, Horse 710	COIPool-710	SRR19660520	1
COIPool-717	COIPool-717_GTGCTG-JRDRM_L001	COIPool-717_GTGCTG-JRDRM_L001_R1.fastq.gz	COIPool-717_GTGCTG-JRDRM_L001_R2.fastq.gz	COI metabarcoding of Cyathostomin: Adult, Horse 717	COIPool-717	SRR19660519	1
COIPool-726	COIPool-726_CAATGC-JRDRM_L001	COIPool-726_CAATGC-JRDRM_L001_R1.fastq.gz	COIPool-726_CAATGC-JRDRM_L001_R2.fastq.gz	COI metabarcoding of Cyathostomin: Adult, Horse 726	COIPool-726	SRR19660518	1
COIPool-729	COIPool-729_TATCAT-JRDRM_L001	COIPool-729_TATCAT-JRDRM_L001_R1.fastq.gz	COIPool-729_TATCAT-JRDRM_L001_R2.fastq.gz	COI metabarcoding of Cyathostomin: Adult, Horse 729	COIPool-729	SRR19660517	1
COIPool-733	COIPool-733_CGCGCC-JRDRM_L001	COIPool-733_CGCGCC-JRDRM_L001_R1.fastq.gz	COIPool-733_CGCGCC-JRDRM_L001_R2.fastq.gz	COI metabarcoding of Cyathostomin: Adult, Horse 733	COIPool-733	SRR19660515	1
COIPool-734	COIPool-734_TCATGT-JRDRM_L001	COIPool-734_TCATGT-JRDRM_L001_R1.fastq.gz	COIPool-734_TCATGT-JRDRM_L001_R2.fastq.gz	COI metabarcoding of Cyathostomin: Adult, Horse 734	COIPool-734	SRR19660514	1
COIPool-748	COIPool-748_CGGCAT-JRDRM_L001	COIPool-748_CGGCAT-JRDRM_L001_R1.fastq.gz	COIPool-748_CGGCAT-JRDRM_L001_R2.fastq.gz	COI metabarcoding of Cyathostomin: Adult, Horse 748	COIPool-748	SRR19660513	1
COIPool-755	COIPool-755_GGAAGA-JRDRM_L001	COIPool-755_GGAAGA-JRDRM_L001_R1.fastq.gz	COIPool-755_GGAAGA-JRDRM_L001_R2.fastq.gz	COI metabarcoding of Cyathostomin: Adult, Horse 755	COIPool-755	SRR19660512	1
ITSCP-ITS	ITSCP-ITS_CATCCT-JG62T_L001	ITSCP-ITS_CATCCT-JG62T_L001_R1.fastq.gz	ITSCP-ITS_CATCCT-JG62T_L001_R2.fastq.gz	ITS metabarcoding of Cyathostomin: mock, 2 species, homogeneous, low concentration	ITSCP-ITS	SRR19660511	1
ITSEggs-646	ITSEggs-646_TGTAAA-JRDRM_L001	ITSEggs-646_TGTAAA-JRDRM_L001_R1.fastq.gz	ITSEggs-646_TGTAAA-JRDRM_L001_R2.fastq.gz	ITS metabarcoding of Cyathostomin: Eggs, Horse 646	ITSEggs-646	SRR19660510	1
ITSEggs-710	ITSEggs-710_ATTAGG-JRDRM_L001	ITSEggs-710_ATTAGG-JRDRM_L001_R1.fastq.gz	ITSEggs-710_ATTAGG-JRDRM_L001_R2.fastq.gz	ITS metabarcoding of Cyathostomin: Eggs, Horse 710	ITSEggs-710	SRR19660509	1
ITSEggs-717	ITSEggs-717_AAAGTA-JRDRM_L001	ITSEggs-717_AAAGTA-JRDRM_L001_R1.fastq.gz	ITSEggs-717_AAAGTA-JRDRM_L001_R2.fastq.gz	ITS metabarcoding of Cyathostomin: Eggs, Horse 717	ITSEggs-717	SRR19660508	1
ITSEggs-720	ITSEggs-720_AACGTC-JRDRM_L001	ITSEggs-720_AACGTC-JRDRM_L001_R1.fastq.gz	ITSEggs-720_AACGTC-JRDRM_L001_R2.fastq.gz	ITS metabarcoding of Cyathostomin: Eggs, Horse 720	ITSEggs-720	SRR19660507	1
ITSEggs-726	ITSEggs-726_CGTTAA-JRDRM_L001	ITSEggs-726_CGTTAA-JRDRM_L001_R1.fastq.gz	ITSEggs-726_CGTTAA-JRDRM_L001_R2.fastq.gz	ITS metabarcoding of Cyathostomin: Eggs, Horse 726	ITSEggs-726	SRR19660506	1
ITSEggs-729	ITSEggs-729_AGAATC-JRDRM_L001	ITSEggs-729_AGAATC-JRDRM_L001_R1.fastq.gz	ITSEggs-729_AGAATC-JRDRM_L001_R2.fastq.gz	ITS metabarcoding of Cyathostomin: Eggs, Horse 729	ITSEggs-729	SRR19660660	1
ITSEggs-733	ITSEggs-733_GTTCTT-JRDRM_L001	ITSEggs-733_GTTCTT-JRDRM_L001_R1.fastq.gz	ITSEggs-733_GTTCTT-JRDRM_L001_R2.fastq.gz	ITS metabarcoding of Cyathostomin: Eggs, Horse 733	ITSEggs-733	SRR19660659	1
ITSEggs-734	ITSEggs-734_AAGGCC-JRDRM_L001	ITSEggs-734_AAGGCC-JRDRM_L001_R1.fastq.gz	ITSEggs-734_AAGGCC-JRDRM_L001_R2.fastq.gz	ITS metabarcoding of Cyathostomin: Eggs, Horse 734	ITSEggs-734	SRR19660658	1
ITSEggs-748	ITSEggs-748_ACTGCG-JRDRM_L001	ITSEggs-748_ACTGCG-JRDRM_L001_R1.fastq.gz	ITSEggs-748_ACTGCG-JRDRM_L001_R2.fastq.gz	ITS metabarcoding of Cyathostomin: Eggs, Horse 748	ITSEggs-748	SRR19660657	1
ITSEggs-755	ITSEggs-755_CGTTTC-JRDRM_L001	ITSEggs-755_CGTTTC-JRDRM_L001_R1.fastq.gz	ITSEggs-755_CGTTTC-JRDRM_L001_R2.fastq.gz	ITS metabarcoding of Cyathostomin: Eggs, Horse 755	ITSEggs-755	SRR19660656	1
ITSH2O-1	ITSH2O-1_TTCGAG-JRDRM_L001	ITSH2O-1_TTCGAG-JRDRM_L001_R1.fastq.gz	ITSH2O-1_TTCGAG-JRDRM_L001_R2.fastq.gz	ITS metabarcoding of Cyathostomin: H2O, Negative control	ITSH2O-1	SRR19660655	1
ITSL3-646	ITSL3-646_TGCACG-JRDRM_L001	ITSL3-646_TGCACG-JRDRM_L001_R1.fastq.gz	ITSL3-646_TGCACG-JRDRM_L001_R2.fastq.gz	ITS metabarcoding of Cyathostomin: L3, Horse 646	ITSL3-646	SRR19660637	1
ITSL3-710	ITSL3-710_GGCCTC-JRDRM_L001	ITSL3-710_GGCCTC-JRDRM_L001_R1.fastq.gz	ITSL3-710_GGCCTC-JRDRM_L001_R2.fastq.gz	ITS metabarcoding of Cyathostomin: L3, Horse 710	ITSL3-710	SRR19660636	1
ITSL3-717	ITSL3-717_CCCGTT-JRDRM_L001	ITSL3-717_CCCGTT-JRDRM_L001_R1.fastq.gz	ITSL3-717_CCCGTT-JRDRM_L001_R2.fastq.gz	ITS metabarcoding of Cyathostomin: L3, Horse 717	ITSL3-717	SRR19660635	1
ITSM1-1	ITSM1-1_ATTACA-JRDRM_L001	ITSM1-1_ATTACA-JRDRM_L001_R1.fastq.gz	ITSM1-1_ATTACA-JRDRM_L001_R2.fastq.gz	ITS metabarcoding of Cyathostomin: mock, ITS_Homogeneous_5species_1	ITSM1-1	SRR19660634	1
ITSM2-1	ITSM2-1_AACCGA-JRDRM_L001	ITSM2-1_AACCGA-JRDRM_L001_R1.fastq.gz	ITSM2-1_AACCGA-JRDRM_L001_R2.fastq.gz	ITS metabarcoding of Cyathostomin: mock, ITS_Heterogeneous_5species_1	ITSM2-1	SRR19660633	1
ITSM3-1	ITSM3-1_TCTATG-JRDRM_L001	ITSM3-1_TCTATG-JRDRM_L001_R1.fastq.gz	ITSM3-1_TCTATG-JRDRM_L001_R2.fastq.gz	ITS metabarcoding of Cyathostomin: mock, ITS_Homogeneous_2species_1to4ratio_1	ITSM3-1	SRR19660632	1
ITSM4-1	ITSM4-1_GCATAC-JRDRM_L001	ITSM4-1_GCATAC-JRDRM_L001_R1.fastq.gz	ITSM4-1_GCATAC-JRDRM_L001_R2.fastq.gz	ITS metabarcoding of Cyathostomin: mock, ITS_Homogeneous_2species_1	ITSM4-1	SRR19660630	1
ITSM5-1	ITSM5-1_GTAGAA-JRDRM_L001	ITSM5-1_GTAGAA-JRDRM_L001_R1.fastq.gz	ITSM5-1_GTAGAA-JRDRM_L001_R2.fastq.gz	ITS metabarcoding of Cyathostomin: mock, ITS_Homogeneous_2species_3to4ratio_1	ITSM5-1	SRR19660629	1
ITSMeq-ITS	ITSMeq-ITS_GGACTT-JG62T_L001	ITSMeq-ITS_GGACTT-JG62T_L001_R1.fastq.gz	ITSMeq-ITS_GGACTT-JG62T_L001_R2.fastq.gz	ITS metabarcoding of Cyathostomin: mock, ITS_mock_Homogeneous_11species	ITSMeq-ITS	SRR19660628	1
ITSMS10-ITS	ITSMS10-ITS_GGCCAA-JG62T_L001	ITSMS10-ITS_GGCCAA-JG62T_L001_R1.fastq.gz	ITSMS10-ITS_GGCCAA-JG62T_L001_R2.fastq.gz	ITS metabarcoding of Cyathostomin: mock, ITS_mock_Heterogeneous_11species	ITSMS10-ITS	SRR19660627	1
ITSPool-646	ITSPool-646_GTGTTT-JRDRM_L001	ITSPool-646_GTGTTT-JRDRM_L001_R1.fastq.gz	ITSPool-646_GTGTTT-JRDRM_L001_R2.fastq.gz	ITS metabarcoding of Cyathostomin: Adult, Horse 646	ITSPool-646	SRR19660626	1
ITSPool-710	ITSPool-710_CGTTGG-JRDRM_L001	ITSPool-710_CGTTGG-JRDRM_L001_R1.fastq.gz	ITSPool-710_CGTTGG-JRDRM_L001_R2.fastq.gz	ITS metabarcoding of Cyathostomin: Adult, Horse 710	ITSPool-710	SRR19660624	1
ITSPool-717	ITSPool-717_CAGCGT-JRDRM_L001	ITSPool-717_CAGCGT-JRDRM_L001_R1.fastq.gz	ITSPool-717_CAGCGT-JRDRM_L001_R2.fastq.gz	ITS metabarcoding of Cyathostomin: Adult, Horse 717	ITSPool-717	SRR19660589	1
ITSPool-726	ITSPool-726_GCCTAA-JRDRM_L001	ITSPool-726_GCCTAA-JRDRM_L001_R1.fastq.gz	ITSPool-726_GCCTAA-JRDRM_L001_R2.fastq.gz	ITS metabarcoding of Cyathostomin: Adult, Horse 726	ITSPool-726	SRR19660588	1
ITSPool-729	ITSPool-729_TCAGCG-JRDRM_L001	ITSPool-729_TCAGCG-JRDRM_L001_R1.fastq.gz	ITSPool-729_TCAGCG-JRDRM_L001_R2.fastq.gz	ITS metabarcoding of Cyathostomin: Adult, Horse 729	ITSPool-729	SRR19660587	1
ITSPool-733	ITSPool-733_TGTCGT-JRDRM_L001	ITSPool-733_TGTCGT-JRDRM_L001_R1.fastq.gz	ITSPool-733_TGTCGT-JRDRM_L001_R2.fastq.gz	ITS metabarcoding of Cyathostomin: Adult, Horse 733	ITSPool-733	SRR19660586	1
ITSPool-734	ITSPool-734_GTGTAG-JRDRM_L001	ITSPool-734_GTGTAG-JRDRM_L001_R1.fastq.gz	ITSPool-734_GTGTAG-JRDRM_L001_R2.fastq.gz	ITS metabarcoding of Cyathostomin: Adult, Horse 734	ITSPool-734	SRR19660584	1
ITSPool-748	ITSPool-748_GACTTT-JRDRM_L001	ITSPool-748_GACTTT-JRDRM_L001_R1.fastq.gz	ITSPool-748_GACTTT-JRDRM_L001_R2.fastq.gz	ITS metabarcoding of Cyathostomin: Adult, Horse 748	ITSPool-748	SRR19660583	1
ITSPool-755	ITSPool-755_ACAGAC-JRDRM_L001	ITSPool-755_ACAGAC-JRDRM_L001_R1.fastq.gz	ITSPool-755_ACAGAC-JRDRM_L001_R2.fastq.gz	ITS metabarcoding of Cyathostomin: Adult, Horse 755	ITSPool-755	SRR19660582	1
ITSM1	ITSM1_ACCCCC-JRDRM_L001	ITSM1_ACCCCC-JRDRM_L001_R1.fastq.gz	ITSM1_ACCCCC-JRDRM_L001_R2.fastq.gz	ITS metabarcoding of Cyathostomin: mock, ITS_Homogeneous_5species	ITSM1	SRR19334699	1
ITSM2	ITSM2_ACCAGG-JRDRM_L001	ITSM2_ACCAGG-JRDRM_L001_R1.fastq.gz	ITSM2_ACCAGG-JRDRM_L001_R2.fastq.gz	ITS metabarcoding of Cyathostomin: mock, ITS_Heterogeneous_5species	ITSM2	SRR19334728	1
ITSM3	ITSM3_GGATCA-JRDRM_L001	ITSM3_GGATCA-JRDRM_L001_R1.fastq.gz	ITSM3_GGATCA-JRDRM_L001_R2.fastq.gz	ITS metabarcoding of Cyathostomin: mock, ITS_Homogeneous_2species_1to4ratio	ITSM3	SRR19334727	1
ITSM4	ITSM4_AAAGCG-JRDRM_L001	ITSM4_AAAGCG-JRDRM_L001_R1.fastq.gz	ITSM4_AAAGCG-JRDRM_L001_R2.fastq.gz	ITS metabarcoding of Cyathostomin: mock, ITS_Homogeneous_2species	ITSM4	SRR19334726	1
ITSM5	ITSM5_AGGCGC-JRDRM_L001	ITSM5_AGGCGC-JRDRM_L001_R1.fastq.gz	ITSM5_AGGCGC-JRDRM_L001_R2.fastq.gz	ITS metabarcoding of Cyathostomin: mock, ITS_Homogeneous_2species_3to4ratio	ITSM5	SRR19334724	1
COIJ42-729	COIJ42-729_GACTAC-JRDRM_L001	COIJ42-729_GACTAC-JRDRM_L001_R1.fastq.gz	COIJ42-729_GACTAC-JRDRM_L001_R2.fastq.gz	COI metabarcoding of Cyathostomin: L3, Horse 729	COIJ42-729	SRR19660665	1
COIJ42-733	COIJ42-733_ACCGAA-JRDRM_L001	COIJ42-733_ACCGAA-JRDRM_L001_R1.fastq.gz	COIJ42-733_ACCGAA-JRDRM_L001_R2.fastq.gz	COI metabarcoding of Cyathostomin: L3, Horse 733	COIJ42-733	SRR19660625	1
COIJ42-734	COIJ42-734_TCGTAT-JRDRM_L001	COIJ42-734_TCGTAT-JRDRM_L001_R1.fastq.gz	COIJ42-734_TCGTAT-JRDRM_L001_R2.fastq.gz	COI metabarcoding of Cyathostomin: L3, Horse 734	COIJ42-734	SRR19660623	1
COIJ42-748	COIJ42-748_ATCACC-JRDRM_L001	COIJ42-748_ATCACC-JRDRM_L001_R1.fastq.gz	COIJ42-748_ATCACC-JRDRM_L001_R2.fastq.gz	COI metabarcoding of Cyathostomin: L3, Horse 748	COIJ42-748	SRR19660614	1
ITSJ42-729	ITSJ42-729_ACGAGA-JRDRM_L001	ITSJ42-729_ACGAGA-JRDRM_L001_R1.fastq.gz	ITSJ42-729_ACGAGA-JRDRM_L001_R2.fastq.gz	ITS metabarcoding of Cyathostomin: L3, Horse 729	ITSJ42-729	SRR19660499
ITSJ42-733	ITSJ42-733_CTGAGG-JRDRM_L001	ITSJ42-733_CTGAGG-JRDRM_L001_R1.fastq.gz	ITSJ42-733_CTGAGG-JRDRM_L001_R2.fastq.gz	ITS metabarcoding of Cyathostomin: L3, Horse 733	ITSJ42-733	SRR19660498
ITSJ42-734	ITSJ42-734_ACAAAA-JRDRM_L001	ITSJ42-734_ACAAAA-JRDRM_L001_R1.fastq.gz	ITSJ42-734_ACAAAA-JRDRM_L001_R2.fastq.gz	ITS metabarcoding of Cyathostomin: L3, Horse 734	ITSJ42-734	SRR19660497
ITSJ42-748	ITSJ42-748_GTTACC-JRDRM_L001	ITSJ42-748_GTTACC-JRDRM_L001_R1.fastq.gz	ITSJ42-748_GTTACC-JRDRM_L001_R2.fastq.gz	ITS metabarcoding of Cyathostomin: L3, Horse 748	ITSJ42-748	SRR19660487
ITSJ42-755	ITSJ42-755_AATATG-JRDRM_L001	ITSJ42-755_AATATG-JRDRM_L001_R1.fastq.gz	ITSJ42-755_AATATG-JRDRM_L001_R2.fastq.gz	ITS metabarcoding of Cyathostomin: L3, Horse 755	ITSJ42-755	SRR19660638

## Sheet: Sheet2
Sample name	SRA
COICP-12	SRR19660663
COIEggs-646	SRR19660662
COIEggs-710	SRR19660581
COIEggs-717	SRR19660534
COIEggs-720	SRR19660523
COIEggs-726	SRR19660478
COIEggs-729	SRR19660621
COIEggs-733	SRR19660610
COIEggs-734	SRR19660563
COIEggs-748	SRR19660516
COIEggs-755	SRR19660661
COIH2O-1	SRR19660650
COIJ0-683	SRR19660603
COIJ0-725	SRR19660592
COIJ0-729	SRR19660548
COIJ0-733	SRR19660536
COIJ0-734	SRR19660495
COIJ0-735	SRR19660642
COIJ0-739	SRR19660631
COIJ0-742	SRR19660585
COIJ0-743	SRR19660580
COIJ0-744	SRR19660579
COIJ0-745	SRR19660578
COIJ0-746	SRR19660577
COIJ0-747	SRR19660576
COIJ0-748	SRR19660575
COIJ0-749	SRR19660574
COIJ0-750	SRR19660573
COIJ0-752	SRR19660537
COIJ0-754	SRR19660535
COIJ0-755	SRR19660533
COIJ28-729	SRR19660532
COIJ28-733	SRR19660531
COIJ28-734	SRR19660530
COIJ28-739	SRR19660529
COIJ28-742	SRR19660528
COIJ28-743	SRR19660527
COIJ28-745	SRR19660526
COIJ28-748	SRR19660525
COIJ28-749	SRR19660524
COIJ28-750	SRR19660522
COIJ28-753	SRR19660521
COIJ28-755	SRR19660486
COIJ35-729	SRR19660485
COIJ35-733	SRR19660484
COIJ35-734	SRR19660483
COIJ35-735	SRR19660482
COIJ35-739	SRR19660481
COIJ35-742	SRR19660480
COIJ35-743	SRR19660479
COIJ35-744	SRR19660477
COIJ35-748	SRR19660476
COIJ35-749	SRR19660475
COIJ35-750	SRR19660664
COIJ35-754	SRR19660667
COIJ42-683	SRR19660666
COIJ42-729	SRR19660665
COIJ42-733	SRR19660625
COIJ42-734	SRR19660623
COIJ42-735	SRR19660622
COIJ42-739	SRR19660620
COIJ42-742	SRR19660619
COIJ42-743	SRR19660618
COIJ42-744	SRR19660617
COIJ42-745	SRR19660616
COIJ42-747	SRR19660615
COIJ42-748	SRR19660614
COIJ42-749	SRR19660613
COIJ42-752	SRR19660612
COIJ42-753	SRR19660611
COIJ42-754	SRR19660609
COIL3-646	SRR19660572
COIL3-710	SRR19660571
COIL3-717	SRR19660570
COIM1	SRR19660568
COIM1-1	SRR19660569
COIM2	SRR19660566
COIM2-1	SRR19660567
COIM3	SRR19660565
COIM4	SRR19660564
COIM5	SRR19660562
COIMeq	SRR19660560
COIMeq-C12	SRR19660561
COIMS10	SRR19660558
COIMS10-C12	SRR19660559
COIPool-646	SRR19660557
COIPool-710	SRR19660520
COIPool-717	SRR19660519
COIPool-726	SRR19660518
COIPool-729	SRR19660517
COIPool-733	SRR19660515
COIPool-734	SRR19660514
COIPool-748	SRR19660513
COIPool-755	SRR19660512
ITSCP-ITS	SRR19660511
ITSEggs-646	SRR19660510
ITSEggs-710	SRR19660509
ITSEggs-717	SRR19660508
ITSEggs-720	SRR19660507
ITSEggs-726	SRR19660506
ITSEggs-729	SRR19660660
ITSEggs-733	SRR19660659
ITSEggs-734	SRR19660658
ITSEggs-748	SRR19660657
ITSEggs-755	SRR19660656
ITSH2O-1	SRR19660655
ITSJ0-683	SRR19660654
ITSJ0-725	SRR19660653
ITSJ0-729	SRR19660652
ITSJ0-733	SRR19660651
ITSJ0-734	SRR19660649
ITSJ0-735	SRR19660648
ITSJ0-739	SRR19660647
ITSJ0-742	SRR19660646
ITSJ0-743	SRR19660644
ITSJ0-744	SRR19660608
ITSJ0-745	SRR19660607
ITSJ0-746	SRR19660606
ITSJ0-747	SRR19660605
ITSJ0-748	SRR19660604
ITSJ0-749	SRR19660602
ITSJ0-750	SRR19660601
ITSJ0-752	SRR19660600
ITSJ0-753	SRR19660599
ITSJ0-754	SRR19660598
ITSJ0-755	SRR19660597
ITSJ28-725	SRR19660596
ITSJ28-729	SRR19660595
ITSJ28-733	SRR19660594
ITSJ28-734	SRR19660593
ITSJ28-735	SRR19660591
ITSJ28-739	SRR19660590
ITSJ28-742	SRR19660556
ITSJ28-743	SRR19660555
ITSJ28-745	SRR19660554
ITSJ28-748	SRR19660553
ITSJ28-749	SRR19660552
ITSJ28-750	SRR19660551
ITSJ28-753	SRR19660550
ITSJ28-755	SRR19660549
ITSJ35-729	SRR19660547
ITSJ35-733	SRR19660546
ITSJ35-734	SRR19660545
ITSJ35-735	SRR19660544
ITSJ35-739	SRR19660543
ITSJ35-742	SRR19660542
ITSJ35-743	SRR19660541
ITSJ35-744	SRR19660540
ITSJ35-748	SRR19660539
ITSJ35-749	SRR19660538
ITSJ35-750	SRR19660505
ITSJ35-752	SRR19660504
ITSJ35-754	SRR19660503
ITSJ35-755	SRR19660502
ITSJ42-683	SRR19660501
ITSJ42-725	SRR19660500
ITSJ42-729	SRR19660499
ITSJ42-733	SRR19660498
ITSJ42-734	SRR19660497
ITSJ42-735	SRR19660496
ITSJ42-739	SRR19660494
ITSJ42-742	SRR19660493
ITSJ42-743	SRR19660492
ITSJ42-744	SRR19660491
ITSJ42-745	SRR19660490
ITSJ42-746	SRR19660489
ITSJ42-747	SRR19660488
ITSJ42-748	SRR19660487
ITSJ42-749	SRR19660645
ITSJ42-750	SRR19660643
ITSJ42-752	SRR19660641
ITSJ42-753	SRR19660640
ITSJ42-754	SRR19660639
ITSJ42-755	SRR19660638
ITSL3-646	SRR19660637
ITSL3-710	SRR19660636
ITSL3-717	SRR19660635
ITSM1-1	SRR19660634
ITSM2-1	SRR19660633
ITSM3-1	SRR19660632
ITSM4-1	SRR19660630
ITSM5-1	SRR19660629
ITSMeq-ITS	SRR19660628
ITSMS10-ITS	SRR19660627
ITSPool-646	SRR19660626
ITSPool-710	SRR19660624
ITSPool-717	SRR19660589
ITSPool-726	SRR19660588
ITSPool-729	SRR19660587
ITSPool-733	SRR19660586
ITSPool-734	SRR19660584
ITSPool-748	SRR19660583
ITSPool-755	SRR19660582
